# Supplementary material for: Growth and Biosynthesis of Phenolic Compounds of Canola (Brassica napus L.) to Different Ultraviolet (UV)-B Wavelengths in a Plant Factory with Artificial Light
Source: MDPI journal article supplement (doi:10.3390/plants11131732), 2022-06-29
Supplement: s1 [file s1]

## Supplementary Information

# Growth and Biosynthesis of Phenolic Compounds of Canola (*Brassica napus* L.) to Different Ultraviolet (UV)-B Wavelengths in a Plant Factory with Artificial Light

Jin-Hui Lee<sup>1</sup>, Saki Tanaka<sup>1</sup> and Eiji Goto<sup>1,2\*</sup>

<sup>1</sup> Graduate School of Horticulture, Chiba University, Matsudo 648, Chiba 271–8510, Japan; jhjh@chiba-u.jp (J.-H.L.); sakitanaka.kanko217@gmail.com (S.T); goto@faculty.chiba-u.jp (E.G)

<sup>2</sup> Plant Molecular Research Center, Chiba University, Chiba 260–0856, Japan; goto@faculty.chiba-u.jp (E.G)

\* Correspondence: goto@faculty.chiba-u.jp; Tel.: (+81-47-308-8843)

**Table S1.** Effect of UV irradiation with or without 300 nm short-cut filters on percentage of dry weight and leaf mass per area for 0–3 days of treatment. Different letters indicate significant differences among the treatments in each UV irradiation intensity at  $p < 0.05$  by Tukey-Kramer's test ( $n = 3-6$ ).

| UV irradiation intensity ( $W\ m^{-2}$ ) | Days of treatment | Treatment | Number of leaves | Percentage of dry weight |          |          | Leaf mass per areas ( $g\ m^{-2}$ ) |          |          |
|------------------------------------------|-------------------|-----------|------------------|--------------------------|----------|----------|-------------------------------------|----------|----------|
|                                          |                   |           |                  | 2nd leaf                 | 3rd leaf | 4th leaf | 2nd leaf                            | 3rd leaf | 4th leaf |
| –                                        | 0                 | –         | 3                | 8.8                      | 9.3      | –        | 2.0                                 | 2.3      | –        |
| 0.3                                      | 1                 | Cont.     | 4                | 12.4                     | 11.8     | –        | 4.1                                 | 3.7      | –        |
|                                          |                   | Cut       | 4                | 10.1                     | 12.6     | –        | 2.8                                 | 3.2      | –        |
|                                          |                   | Non cut   | 4                | 10.8                     | 14.5     | –        | 2.9                                 | 3.4      | –        |
|                                          | 2                 | Cont.     | 4                | 9.3                      | 10.6     | b        | 2.9                                 | 2.8      | b        |
|                                          |                   | Cut       | 4                | 9.8                      | 11.5     | ab       | 3.0                                 | 3.1      | b        |
|                                          |                   | Non cut   | 4                | 11.5                     | 12.9     | a        | 3.5                                 | 4.3      | a        |
|                                          | 3                 | Cont.     | 5                | 9.6                      | 11.9     | 14.1     | 3.1                                 | 3.4      | b        |
|                                          |                   | Cut       | 5                | 10.0                     | 11.3     | 12.9     | 3.2                                 | 3.7      | a        |
|                                          |                   | Non cut   | 5                | 10.7                     | 12.3     | 13.3     | 4.1                                 | 4.0      | a        |
| 0.6                                      | 1                 | Cont.     | 4                | 12.4                     | 11.8     | ab       | 4.1                                 | 3.7      | b        |
|                                          |                   | Cut       | 4                | 12.4                     | 11.9     | a        | 3.7                                 | 4.1      | a        |
|                                          |                   | Non cut   | 4                | 10.2                     | 9.9      | b        | 3.1                                 | 3.1      | b        |
|                                          | 2                 | Cont.     | 4                | 9.3                      | 10.6     | 14.6     | 2.9                                 | 2.8      | 4.0      |
|                                          |                   | Cut       | 4                | 9.5                      | 11.2     | 15.1     | 3.2                                 | 3.9      | 5.3      |
|                                          |                   | Non cut   | 4                | 10.2                     | 12.1     | 15.5     | 3.2                                 | 4.4      | 8.3      |
|                                          | 3                 | Cont.     | 5                | 9.6                      | 11.9     | 14.1     | 3.1                                 | 3.4      | c        |
|                                          |                   | Cut       | 5                | 10.0                     | 13.3     | 16.5     | 3.6                                 | 4.2      | b        |
|                                          |                   | Non cut   | 5                | 10.6                     | 12.1     | 15.7     | 3.6                                 | 5.3      | a        |
| 0.9                                      | 1                 | Cont.     | 4                | 12.4                     | 11.8     | b        | 4.1                                 | 3.7      | b        |
|                                          |                   | Cut       | 4                | 9.9                      | 13.0     | ab       | 3.3                                 | 4.1      | a        |
|                                          |                   | Non cut   | 4                | 9.0                      | 13.0     | a        | 3.0                                 | 3.9      | ab       |
|                                          | 2                 | Cont.     | 4                | 9.3                      | 10.6     | b        | 2.9                                 | 2.8      | b        |
|                                          |                   | Cut       | 4                | 11.5                     | 13.5     | a        | 3.8                                 | 4.7      | a        |
|                                          |                   | Non cut   | 4                | 9.7                      | 13.3     | ab       | 3.2                                 | 4.0      | a        |
|                                          | 3                 | Cont.     | 5                | 9.6                      | 11.9     | 14.1     | 3.1                                 | 3.4      | b        |
|                                          |                   | Cut       | 4                | 9.4                      | 12.8     | 13.4     | 3.4                                 | 5.0      | a        |
|                                          |                   | Non cut   | 4                | 10.6                     | 12.9     | 15.1     | 2.7                                 | 4.4      | a        |

**Table S2.** Primers of internal standard gene and flavonoid pathway genes used in real time PCR.

| Gene symbol | Gene name                   |                    | Primer sequence (5'-3')                       | Product length (bp) |
|-------------|-----------------------------|--------------------|-----------------------------------------------|---------------------|
| <i>ACT</i>  | Actin                       | Forward<br>Reverse | AGTACTCTTCCAGCCGTCGC<br>GCGCCGTGATCTCTTTGCTC  | 182                 |
| <i>PAL</i>  | Phenylalanin ammonia-lyase  | Forward<br>Reverse | TCTACACGTACGCGGACGAC<br>TAGGTAGCACCGCCTTGAGC  | 171                 |
| <i>C4H</i>  | Cinnamic acid 4-hydroxylase | Forward<br>Reverse | CTGGCGCAAGATGAGGAGGA<br>TGGTCGCGGAGTCAGGATTC  | 134                 |
| <i>4CL</i>  | 4 coumarate-CoA ligase      | Forward<br>Reverse | TGTTCCGCCGCTTGTGATTG<br>ACACTGGTCCTGCCTCTGTC  | 185                 |
| <i>CHS</i>  | Chalcone synthase           | Forward<br>Reverse | CTGCGGCCCAGACCATCTTA<br>ATCTTCTCCGCCTTGAGCCC  | 250                 |
| <i>CHI</i>  | Chalcone isomerase          | Forward<br>Reverse | TTGCTCTCTCCCCTAACGGC<br>CCCAGGAGACACACCCTTCT  | 146                 |
| <i>F3H</i>  | Flavonoid 3-hydroxylase     | Forward<br>Reverse | TCGCTCGAGACTTCTTCGCC<br>AGCCAAACCCATCAGCCTCT  | 242                 |
| <i>FLS</i>  | Flavonoid synthase          | Forward<br>Reverse | TGGTGAAAGCCAGCGAGACA<br>GTTGAATCAGCTGGCCTCGC  | 151                 |
| <i>F3'H</i> | Flavonoid 3'-hydroxylase    | Forward<br>Reverse | GCGGTTCCCTTTGGTTGTGCA<br>TCCACCGTGCAAGACCTAGC | 112                 |
| <i>DFR</i>  | Dihydroflavonol 4-reductase | Forward<br>Reverse | AGCAGCTTGGGATTACGCGA<br>CCCTTGGCAGCAGCTTGTTTC | 231                 |
| <i>ANS</i>  | Anthocyanidin synthase      | Forward<br>Reverse | GGAGCTCAAGAAGGCGGCTA<br>CAAGCTGTCCACTCGCGTTG  | 209                 |
| <i>ANR</i>  | Anthocyanidin reductase     | Forward<br>Reverse | TCAGACCGCTGTAACCACCG<br>GGTCCCCGAGCTGTTGAAGT  | 179                 |

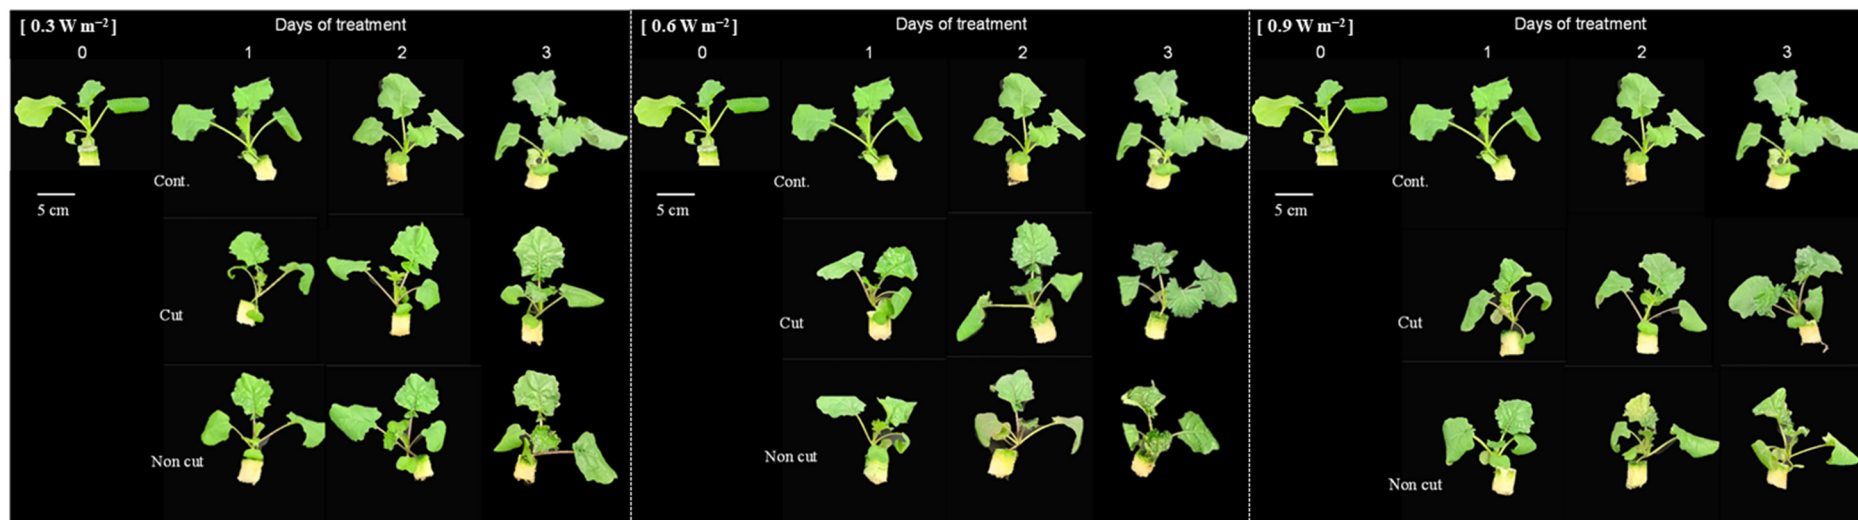

**Figure S1.** Canola plants during UV treatment. UV irradiation intensity was set at 0.3, 0.6, and 0.9 W m<sup>-2</sup> treatment. UV 310 nm broad lamp (TL20W/12RS, Philips, Hamburg, Germany) was used as UV light source.

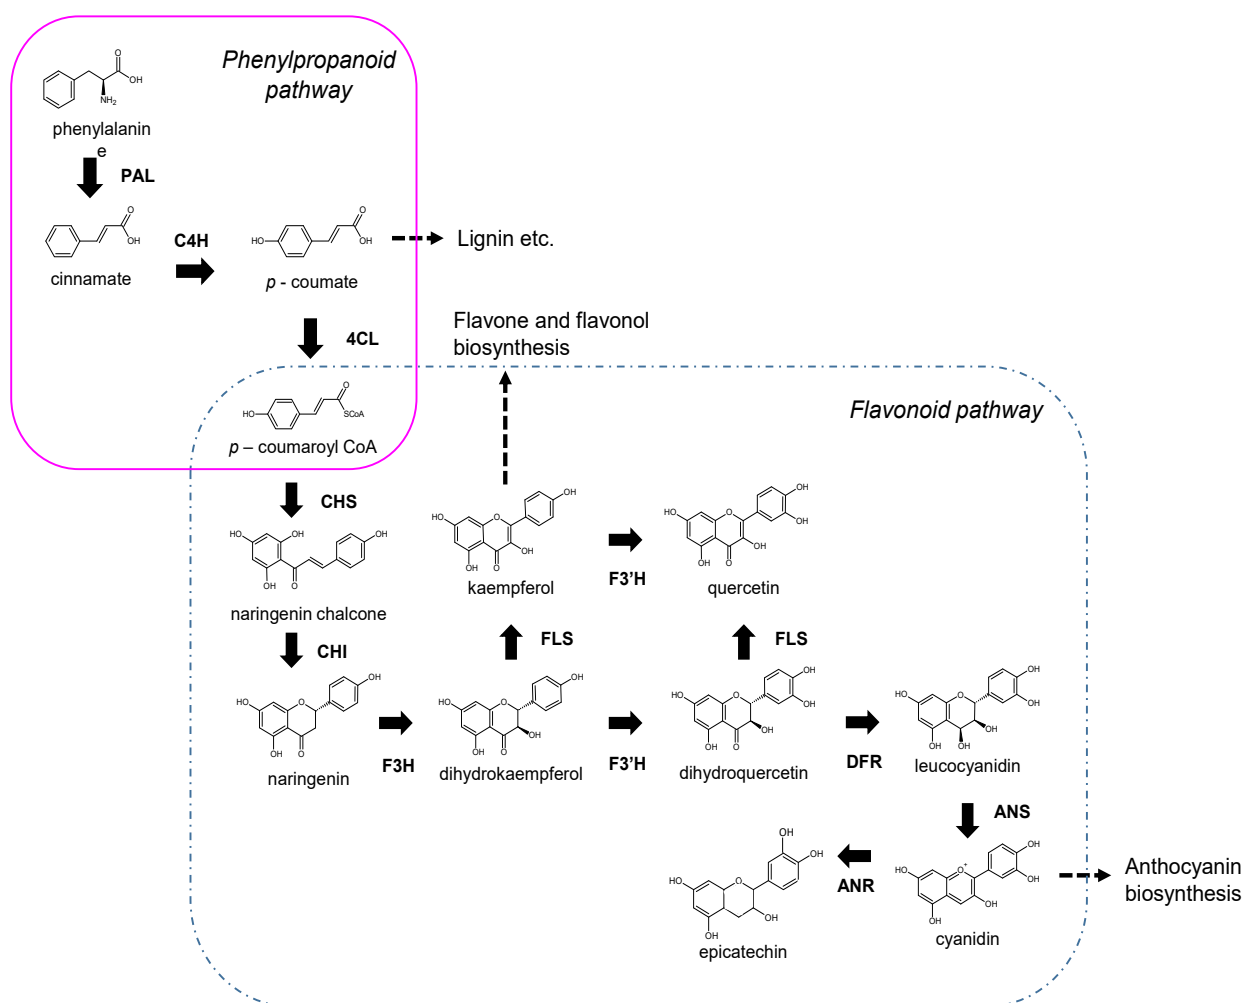

**Figure S2.** Phenylpropanoid and flavonoid biosynthetic pathways. Bold character means the name of enzyme relating phenylpropanoid and flavonoid pathway. The arrow indicates the activity of the enzyme. Dot line arrow means divergent pathway.

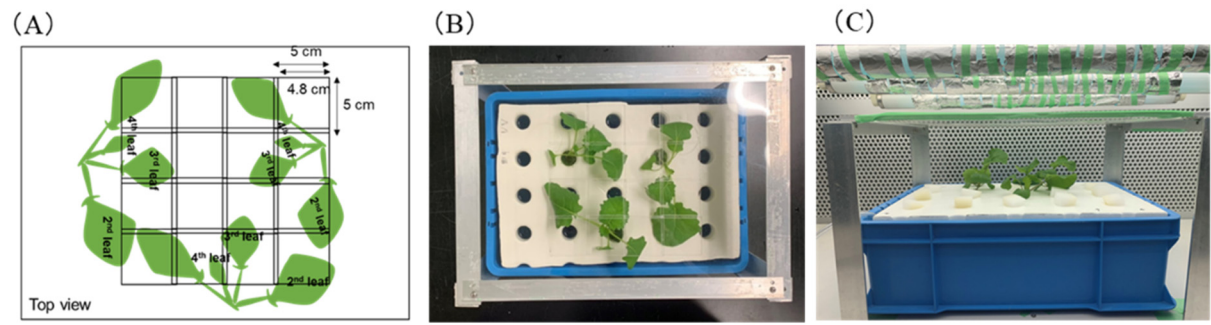

**Figure S3.** Schematic of plan view of lighting lack (A) and image used for this experiment (B,C).
